# Supplementary material for: Organogel or polymer gel; facilitated gelation of a sugar-based organic gel by the addition of a boronic acid-appended polymer
Source: Royal Society of Chemistry journal article supplement (doi:10.1039/b102436c), 2001-01-01
Supplement: b102436c.doc [file b102436c.doc]

*Supplementary Material*

**Organogel or polymer gel; facilitated gelation of a sugar-based organic gel by the addition of a boronic acid-appended polymer.**

Hideki Kobayashi,*a* Masato Amaike, *a* Jong Hwa Jung, *a* Arianna Friggeri, *a*

Seiji Shinkai**a* and David N. Reinhoudt**b*

*a Chemotransfiguration Project, Japan Science and Technology Corporation, Aikawa, Kurume, Fukuoka 839-0861, Japan*

*b Chemotransfiguration Project, MESA+ Research Institute, University of Twente, 7500 AE Enschede, The Netherlands*

# Miscellaneous

1H NMR spectra were measured with a BRUKER ARX300 apparatus. Hydrobromide salt of poly(L-lysine) (Mw 50000 - 100000) was purchased from Wako Pure Chemical Industries, Ltd.

**Synthesis of *N*--acetyl-*N*--(4-boronophenyl)-L-lysine methyl ester (3)**

4-Carboxyphenylboronic acid (100 mg, 0.6 mmol) was refluxed in thionyl chloride (2.2 ml, 30.2 mmol) containing a few drops of DMF under a nitrogen atmosphere for 2 h. The reaction mixture was concentrated to dryness under the reduced pressure and the residue was dissolved in THF (15 ml). This solution was added dropwise to a stirred solution of *N*--acetyl-L-lysine methyl ester hydrochloride (95.4 mg, 0.4 mmol) and triethylamine (0.27 ml, 2.0 mmol) in MeOH (5 ml) at 0 °C under a nitrogen atmosphere. After stirring for 12 h at room temperature, the reaction mixture was evaporated to dryness and the residue was purified by silica gel column chromatography eluting with ethyl acetate : methanol (7 : 1 v/v) to give *N*--acetyl-*N*--(4-boronophenyl)-L-lysine methyl ester as viscous oil (116 mg, 83 % yield); (found: C, 55.1; H, 6.50; N, 7.90 %. C16H23BN2O6 requires C, 54.88; H, 6.62; N, 8.00 %); **H (300 MHz; CD3OD, 25 °C) 1.32-1.78 (6H, m, CH2), 1.89 (3H, s, CH3CO), 2.82 (2H, t, *J* 6.6, CH2), 3.61 (3H, s, COOCH3), 4.29 (1H, dd, *J* 9.0 and 5.1, CH), 7.66 (2H, d, *J* 8.4, ArH), 8.09 (2H, d, *J* 8.4, ArH).

**Synthesis of poly(L-lysine) derivative with a tolyl group (4)**

*p*-Toluic acid (196 mg, 1.44 mmol) was refluxed in thionyl chloride (6.6 ml, 90.5 mmol) containing a few drops of DMF under a nitrogen atmosphere for 2 h. The reaction mixture was concentrated to dryness under the reduced pressure and the residue was dissolved in THF (15 ml). This solution was added dropwise to a stirred solution of poly(L-lysine) hydrobromide (100 mg, 0.48 unit mmol) and triethylamine (0.33 ml, 2.40 mmol) in MeOH (15 ml) at 0 °C under a nitrogen atmosphere. After stirring for 12 h at room temperature, the reaction mixture was evaporated to dryness and the residue was dissolved in a small amount of MeOH. This was then added to acetone and the precipitate was filtered (98.2 mg, 74 % yield); (found: C, 67.50; H, 7.30; N, 11.10 %. C14H18N2O2·0.2H2O requires C, 67.77; H, 7.39; N, 11.29 %); **H (300 MHz; CD3OD, 25 °C) 1.12-2.10 (6H, m, CH2), 2.44 (3H, s, Ar-CH3), 2.89 (2H, bs, CH2), 3.93 (1H, bs, CH), 7.16 (2H, d, *J* 8.4, ArH in dansyl), 7.32 (2H, d, *J* 8.4, ArH).
